# Supplementary material
Source: Springer Nature journal article supplement (https://www.springermedizin.de/resource/supplementary/13046_2011_533_MOESM3_ESM.pdf/9662210)

**A**

CDK8

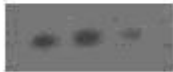 $\beta$ -actin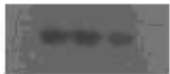

a b c

**B** $\beta$ -catenin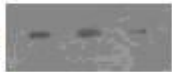 $\beta$ -actin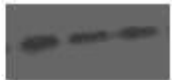

a b c

Supplement: MOESM3 [file 9662210]
